# Supplementary material
Source: PubMed Central journal article supplement (PMC7093204)

Supplementary Figure 1

Extended Data Figure 1a

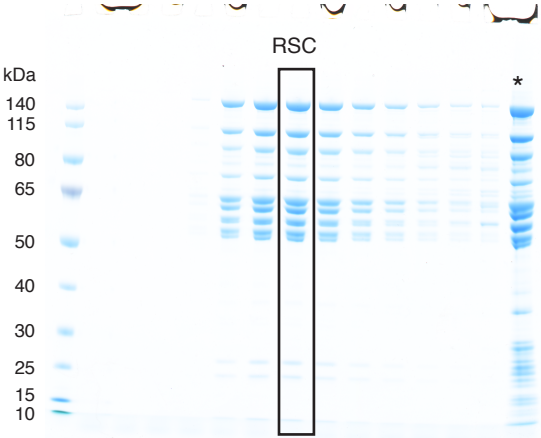

Extended Data Figure 1b

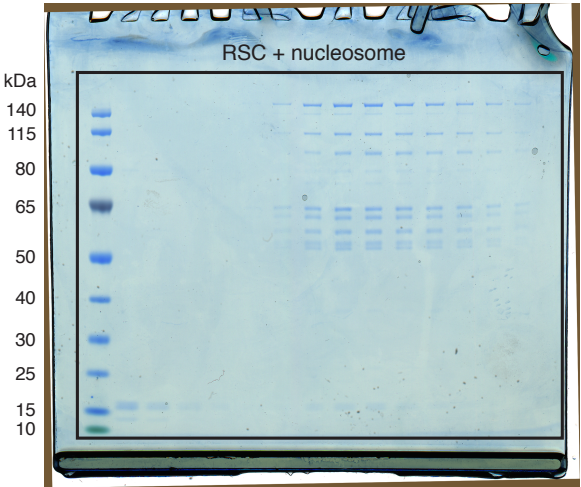

Supplement: EMS85400-supplement-Supplementary_figure_1.pdf [file EMS85400-supplement-Supplementary_figure_1.pdf]
